# Supplementary material
Source: publisher figshare collection journal article supplement (https://acs.figshare.com/ndownloader/files/3599697)
Supplement: Supplementary file 1 [file 3599697]

#======================================================================

# CRYSTAL DATA

#----------------------------------------------------------------------

data_VESTA_phase_1


_pd_phase_name                         'phase6                                '
_cell_length_a                         2.03325
_cell_length_b                         5.38629
_cell_length_c                         3.96702
_cell_angle_alpha                      90
_cell_angle_beta                       90
_cell_angle_gamma                      90
_symmetry_space_group_name_H-M         'P 1'
_symmetry_Int_Tables_number            1

loop_
_symmetry_equiv_pos_as_xyz
   'x, y, z'

loop_
   _atom_site_label
   _atom_site_occupancy
   _atom_site_fract_x
   _atom_site_fract_y
   _atom_site_fract_z
   _atom_site_adp_type
   _atom_site_B_iso_or_equiv
   _atom_site_type_symbol
   N1         1.0     0.000000      0.187274      0.757949     Biso  1.000000 N
   N2         1.0     0.000000      0.687274      0.257949     Biso  1.000000 N
   N3         1.0     0.500000      0.187274      0.257949     Biso  1.000000 N
   N4         1.0     0.500000      0.687274      0.757949     Biso  1.000000 N
   N5         1.0     0.000000      0.812726      0.757949     Biso  1.000000 N
   N6         1.0     0.000000      0.312726      0.257949     Biso  1.000000 N
   N7         1.0     0.500000      0.812726      0.257949     Biso  1.000000 N
   N8         1.0     0.500000      0.312726      0.757949     Biso  1.000000 N
   O1         1.0     0.500000      0.500000      0.946923     Biso  1.000000 O
   O2         1.0     0.500000      0.000000      0.446923     Biso  1.000000 O
   O3         1.0     0.000000      0.500000      0.446923     Biso  1.000000 O
   O4         1.0     0.000000      0.000000      0.946923     Biso  1.000000 O
